# Supplementary material
Source: Springer Nature journal article supplement (https://www.springermedizin.de/resource/supplementary/12936_2009_965_MOESM3_ESM.pdf/9548650)

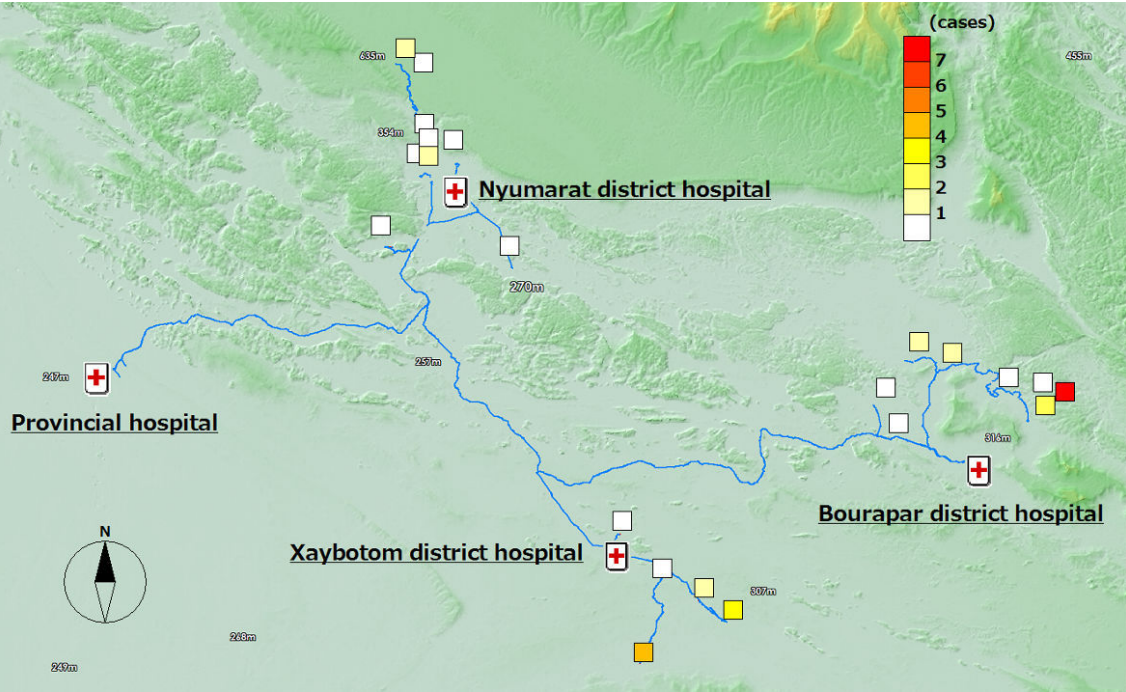

Supplement: MOESM3 [file 9548650]
